# Supplementary material for: Structural Characterization of the Full-Length Anti-CD20 Antibody Rituximab
Source: Frontiers journal article supplement (doi:10.3389/fmolb.2022.823174), 2022-04-11
Supplement: Presentation_1.pdf [file Presentation_1.pdf]

## *Supplementary Material*

### **Structural characterization of the full-length anti-CD20 antibody rituximab**

**Benny Danilo Belviso<sup>1</sup>, Giuseppe Felice Mangiatordi<sup>1</sup>, Domenico Alberga<sup>2</sup>, Vincenzo Mangini<sup>1</sup>,  
Benedetta Carrozzini<sup>1</sup>, Rocco Caliandro<sup>1\*</sup>**

<sup>1</sup>Institute of Crystallography, CNR, Bari, Italy

<sup>2</sup>Cineca, Casalecchio di Reno, Italy

**\* Correspondence:**

Corresponding Author: [rocco.caliandro@ic.cnr.it](mailto:rocco.caliandro@ic.cnr.it)

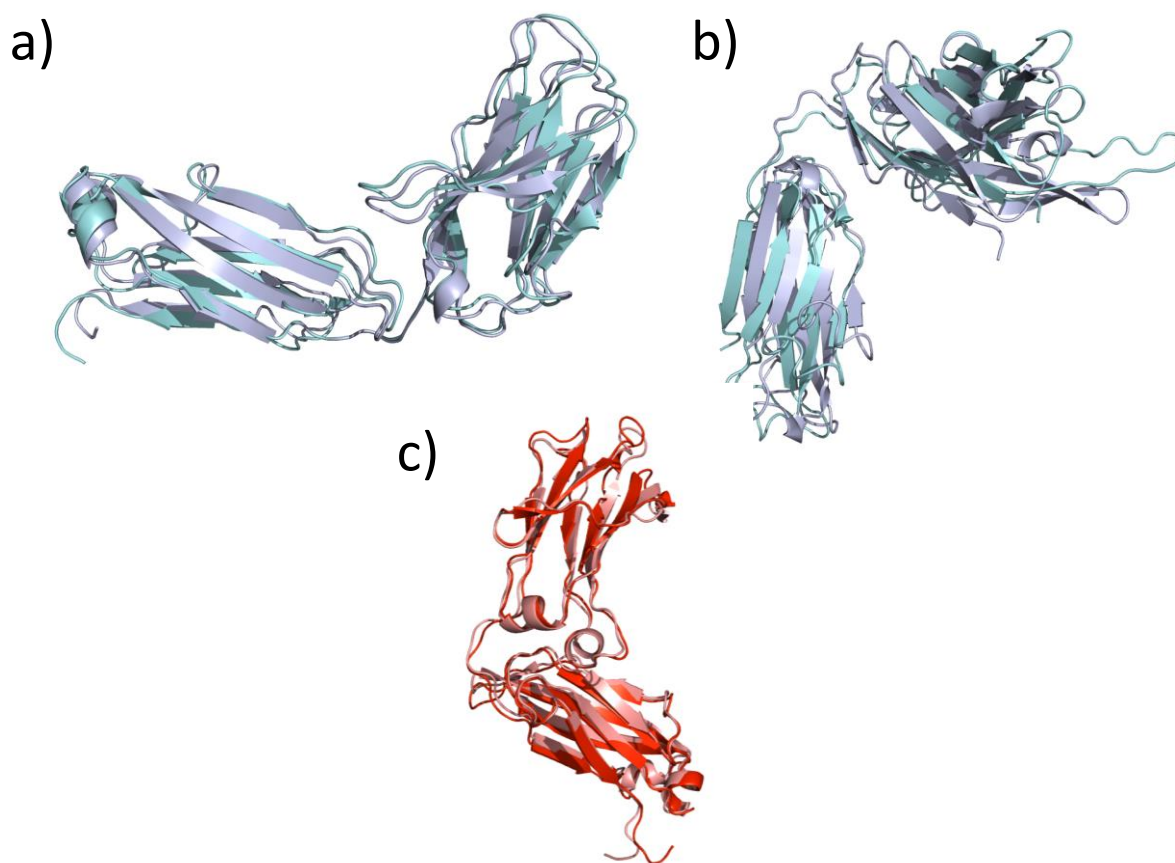

Figure S1. Superposition between the machine learning (lilac and light red) and the homology modelling (cyan and dark red) predictions of the light chain (a), Fab portion heavy chain (b) and Fc portion heavy chain (c).

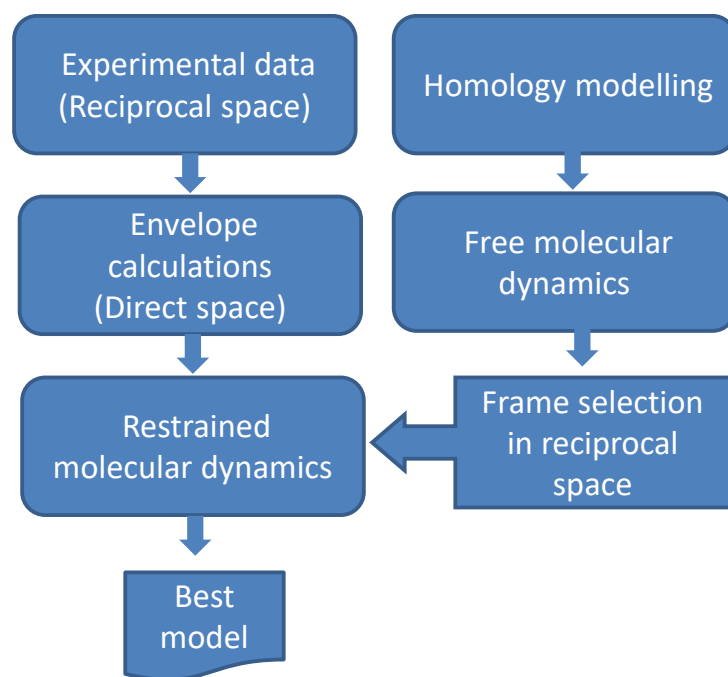

**Figure S2.** Scheme of the experimental data analysis integrated with computational modelling. Best model is obtained from SAXS data as a result of a procedure that uses experimental information in reciprocal (SAXS radial profiles) and direct (SAXS envelopes) space.

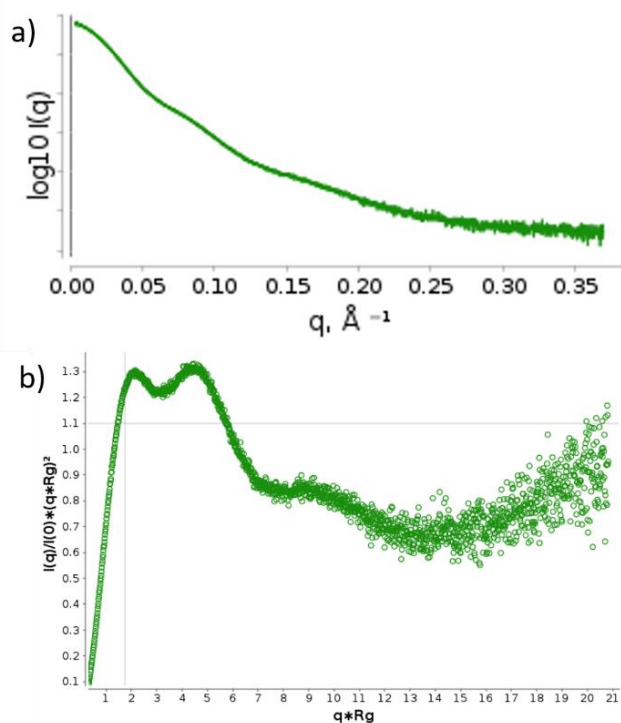

**Figure S3.** Logarithmic profile (a) and normalized Kratky plot (b) from SAXS measurements on rituximab. The position of the peak expected for compact globular scatters is shown by thin horizontal and vertical lines.

**Table S1.** Additives tested in solutions containing Rituximab.

| <b>Code</b> | <b>Extended name</b> | <b>IUPAC name</b>                                      | <b>Properties</b>                                        |
|-------------|----------------------|--------------------------------------------------------|----------------------------------------------------------|
| <b>MPD</b>  | MPD                  | 2-Methylpentane-2,4-diol                               | Surfactant and emulsion-stabilizer                       |
| <b>ETO</b>  | EtOH                 | Ethanol                                                | Alcohol naturally produced by the fermentation of sugars |
| <b>BET</b>  | Betaine              | (Trimethylazaniumyl)acetate                            | Amino acid derivative occurring in plants                |
| <b>SOB</b>  | Sorbitol             | (2S,3R,4R,5R)-Hexane-1,2,3,4,5,6-hexol                 | Sugar alcohol                                            |
| <b>PRO</b>  | Proline              | Pyrrolidine-2-carboxylic acid                          | Proteinogenic amino acid                                 |
| <b>TAU</b>  | Taurine              | 2-Aminoethane-1-sulfonic acid                          | Antioxidant, osmoregulator, membrane stabilizer          |
| <b>SAC</b>  | Saccharose           | $\beta$ -D-Fructofuranosyl $\alpha$ -D-glucopyranoside | Disaccharide                                             |
| <b>TWE</b>  | Polysorbate 80       | Polyoxyethylene (20) sorbitan monooleate               | Non-ionic surfactant and emulsifier                      |

**Table S2.** Sugars of different complexity tested in solutions containing Rituximab.

| Name       | Type            | Chemical formula     | Chemical structure                                                                    |
|------------|-----------------|----------------------|---------------------------------------------------------------------------------------|
| Sorbitol   | Monosaccharides | $C_6H_{14}O_6$       | 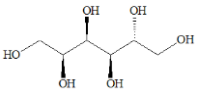   |
| Glucose    | Monosaccharides | $C_6H_{12}O_6$       |    |
| Fructose   | Monosaccharides | $C_6H_{12}O_6$       |    |
| Galactose  | Monosaccharides | $C_6H_{12}O_6$       |    |
| Sucrose    | Disaccharides   | $C_{12}H_{22}O_{11}$ |   |
| Lactose    | Disaccharides   | $C_{12}H_{22}O_{11}$ |  |
| Maltose    | Disaccharides   | $C_{12}H_{22}O_{11}$ |  |
| Cellobiose | Disaccharides   | $C_{12}H_{22}O_{11}$ |  |
| Raffinose  | Trisaccharides  | $C_{18}H_{32}O_{16}$ |  |
